# Supplementary material for: Systolic blood pressure at age 40 and 30-year stroke risk in men and women
Source: PubMed Central journal article supplement — Open Heart. 2024 Aug 22;11(2):e002805. doi: 10.1136/openhrt-2024-002805 (PMC11344497; doi:10.1136/openhrt-2024-002805), 2024-08-22
Supplement: openhrt-11-2-s001.pdf [file openhrt-11-2-s001.pdf]

# **SUPPLEMENTAL MATERIAL**

Systolic blood pressure at age 40 and 30-year stroke risk in men and women

Walle-Hansen et al.

## **Contents**

Tables S1-S6

**Table S1:** Study population characteristics among women and men by systolic blood pressure at age 40 years, n=2 608.

|                                                             | Systolic blood pressure at age 40 years (mm Hg) |             |             |             | P value |
|-------------------------------------------------------------|-------------------------------------------------|-------------|-------------|-------------|---------|
|                                                             | <120                                            | 120-129     | 130-139     | ≥140        |         |
| <b>Women</b>                                                |                                                 |             |             |             |         |
| N                                                           | 551 (42%)                                       | 410 (31%)   | 228 (17%)   | 124 (10%)   | <0.001  |
| Age, years, mean ± SD                                       | 40.0 ± 0.3                                      | 40.0 ± 0.3  | 40.0 ± 0.2  | 40.0 ± 0.3  | 0.959   |
| Body mass index, kg/m <sup>2</sup> , mean ± SD              | 22.9 ± 2.7                                      | 23.6 ± 3.3  | 24.5 ± 4.1  | 25.2 ± 4.7  | <0.001  |
| Obesity                                                     | 10 (2%)                                         | 23 (6%)     | 23 (10%)    | 19 (15%)    | <0.001  |
| Systolic blood pressure, mm Hg, mean ± SD                   | 112.1 ± 5.7                                     | 124.4 ± 2.9 | 134.0 ± 2.8 | 148.8 ± 8.8 | <0.001  |
| Diastolic blood pressure, mm Hg, mean ± SD                  | 70.2 ± 6.1                                      | 76.1 ± 6.0  | 81.6 ± 6.4  | 89.9 ± 9.3  | <0.001  |
| Non-caucasian                                               | 9 (2%)                                          | 4 (1%)      | 3 (1%)      | 0 (0%)      | 0.469   |
| Higher education <sup>a</sup>                               | 226 (41%)                                       | 163 (40%)   | 86 (38%)    | 43 (35%)    | 0.588   |
| Physical activity                                           |                                                 |             |             |             | 0.536   |
| Sedentary activity                                          | 112 (20%)                                       | 64 (16%)    | 48 (21%)    | 24 (19%)    | -       |
| Walking or cycling at least 4 h/week                        | 372 (68%)                                       | 282 (69%)   | 151 (66%)   | 88 (71%)    | -       |
| Recreational sports at least 4 h/week                       | 62 (11%)                                        | 59 (14%)    | 28 (12%)    | 11 (9%)     | -       |
| Hard training several times per week                        | 5 (1%)                                          | 5 (1%)      | 1 (1%)      | 1 (1%)      | -       |
| Smoking <sup>b</sup>                                        |                                                 |             |             |             | 0.297   |
| Never                                                       | 211 (38%)                                       | 176 (43%)   | 100 (44%)   | 55 (44%)    | -       |
| Current or previous                                         | 340 (62%)                                       | 234 (57%)   | 127 (56%)   | 69 (56%)    | -       |
| Cardiovascular comorbidity                                  |                                                 |             |             |             |         |
| Myocardial infarction or angina                             | 0 (0.0%)                                        | 2 (0.5%)    | 0 (0.0%)    | 0 (0.0%)    | 0.220   |
| Hypertension <sup>c</sup>                                   | 1 (0.2%)                                        | 2 (0.5%)    | 0 (0.0%)    | 10 (8.1%)   | <0.001  |
| Diabetes <sup>d</sup>                                       | 1 (0.2%)                                        | 2 (0.5%)    | 0 (0.0%)    | 1 (0.8%)    | 0.485   |
| Biomarkers, mean ± SD                                       |                                                 |             |             |             |         |
| Cholesterol, mmol/L                                         | 5.2 ± 0.9                                       | 5.2 ± 0.9   | 5.5 ± 1.0   | 5.5 ± 0.9   | <0.001  |
| Triglycerides, mmol/L                                       | 1.2 ± 0.6                                       | 1.2 ± 0.7   | 1.4 ± 0.8   | 1.4 ± 0.8   | <0.001  |
| <b>Men</b>                                                  |                                                 |             |             |             |         |
| N                                                           | 160 (12%)                                       | 382 (30%)   | 389 (30%)   | 364 (28%)   | <0.001  |
| Age, years, mean ± SD                                       | 40.1 ± 0.4                                      | 40.1 ± 0.3  | 40.1 ± 0.3  | 40.0 ± 0.3  | 0.458   |
| Body mass index, kg/m <sup>2</sup> <sup>e</sup> , mean ± SD | 24.0 ± 3.0                                      | 25.1 ± 2.9  | 25.5 ± 2.6  | 26.0 ± 2.9  | <0.001  |
| Obesity                                                     | 7 (4%)                                          | 23 (6%)     | 22 (6%)     | 29 (8%)     | 0.383   |
| Systolic blood pressure, mm Hg, mean ± SD                   | 115.2 ± 4.0                                     | 125.2 ± 2.8 | 134.6 ± 2.8 | 148.9 ± 8.0 | <0.001  |
| Diastolic blood pressure, mm Hg, mean ± SD                  | 71.6 ± 6.1                                      | 76.1 ± 6.5  | 81.4 ± 6.8  | 88.5 ± 8.6  | <0.001  |
| Non-caucasian                                               | 4 (3%)                                          | 5 (1%)      | 5 (1%)      | 6 (2%)      | 0.730   |
| Higher education <sup>f</sup>                               | 94 (59%)                                        | 194 (51%)   | 188 (48%)   | 166 (46%)   | 0.041   |
| Physical activity                                           |                                                 |             |             |             | 0.451   |
| Sedentary activity                                          | 31 (19%)                                        | 66 (17%)    | 74 (19%)    | 65 (18%)    | -       |
| Walking or cycling at least 4 h/week                        | 92 (57%)                                        | 203 (53%)   | 187 (48%)   | 201 (55%)   | -       |
| Recreational sports at least 4 h/week                       | 33 (21%)                                        | 100 (26%)   | 112 (29%)   | 90 (25%)    | -       |
| Hard training several times per week                        | 4 (3%)                                          | 13 (3%)     | 16 (4%)     | 8 (2%)      | -       |
| Smoking <sup>g</sup>                                        |                                                 |             |             |             | 0.632   |
| Never                                                       | 65 (42%)                                        | 135 (36%)   | 151 (39%)   | 138 (38%)   | -       |
| Current or previous                                         | 90 (58%)                                        | 238 (64%)   | 233 (61%)   | 221 (62%)   | -       |
| Cardiovascular comorbidity                                  |                                                 |             |             |             |         |
| Myocardial infarction or angina                             | 3 (1.9%)                                        | 2 (0.5%)    | 3 (0.8%)    | 3 (0.8%)    | 0.473   |
| Hypertension <sup>h</sup>                                   | 2 (1.3%)                                        | 3 (0.8%)    | 2 (0.5%)    | 16 (4.4%)   | <0.001  |
| Diabetes <sup>i</sup>                                       | 0 (0.0%)                                        | 0 (0.0%)    | 0 (0.0%)    | 3 (0.8%)    | 0.052   |
| Biomarkers, mean ± SD                                       |                                                 |             |             |             |         |
| Cholesterol, mmol/L                                         | 5.4 ± 1.0                                       | 5.6 ± 1.0   | 5.7 ± 1.0   | 5.9 ± 1.1   | <0.001  |
| Triglycerides, mmol/L                                       | 1.9 ± 1.2                                       | 2.0 ± 1.2   | 2.1 ± 1.4   | 2.4 ± 1.9   | <0.001  |

SD: standard deviation, Obesity: body mass index  $\geq 30$  kg/m<sup>2</sup>, higher education: at least 4 years of college or university training. <sup>a</sup>3 missing values, <sup>b</sup>1 missing value, <sup>c</sup>1 missing value, <sup>d</sup>1 missing value, <sup>e</sup>1 missing value, <sup>f</sup>5 missing values, <sup>g</sup>24 missing values, <sup>h</sup>2 missing values, <sup>i</sup>1 missing value.

**Table S2:** Characteristics at the first visit of the ACE 1950 Study (2012-2015, at ages 62-65 years) by systolic blood pressure at age 40 years, n=2 608.

|                                                    | Systolic blood pressure at age 40 years (mm Hg) |                  |                  |                  | P value |
|----------------------------------------------------|-------------------------------------------------|------------------|------------------|------------------|---------|
|                                                    | <120                                            | 120-129          | 130-139          | $\geq 140$       |         |
| Age, years, mean $\pm$ SD                          | 63.9 $\pm$ 0.7                                  | 63.9 $\pm$ 0.6   | 63.9 $\pm$ 0.7   | 63.9 $\pm$ 0.6   | 0.761   |
| Body mass index, kg/m <sup>2</sup>                 | 25.9 $\pm$ 4.2                                  | 26.9 $\pm$ 4.3   | 27.6 $\pm$ 4.5   | 28.0 $\pm$ 4.3   | <0.001  |
| Systolic blood pressure, mm Hg, mean $\pm$ SD      | 130.3 $\pm$ 17.8                                | 137.4 $\pm$ 17.7 | 140.4 $\pm$ 16.5 | 146.3 $\pm$ 17.7 | <0.001  |
| Diastolic blood pressure, mm Hg, mean $\pm$ SD     | 72.6 $\pm$ 9.4                                  | 76.6 $\pm$ 9.6   | 78.8 $\pm$ 9.3   | 80.9 $\pm$ 9.6   | <0.001  |
| Physically active at least 30 <sup>a</sup> min/day | 609 (87%)                                       | 664 (84%)        | 503 (83%)        | 415 (86%)        | 0.194   |
| Smoking <sup>b</sup>                               |                                                 |                  |                  |                  | 0.132   |
| Never                                              | 235 (33%)                                       | 261 (33%)        | 214 (35%)        | 169 (35%)        | -       |
| Daily or occasional                                | 154 (22%)                                       | 130 (17%)        | 121 (20%)        | 77 (16%)         | -       |
| Previous                                           | 315 (45%)                                       | 396 (50%)        | 277 (45%)        | 239 (49%)        | -       |
| Cardiovascular comorbidity                         |                                                 |                  |                  |                  |         |
| Hypertension                                       | 259 (36%)                                       | 471 (60%)        | 437 (71%)        | 428 (88%)        | <0.001  |
| Cardiac disease                                    | 48 (7%)                                         | 82 (10%)         | 69 (11%)         | 98 (20%)         | <0.001  |
| Diabetes <sup>c</sup>                              | 24 (3%)                                         | 54 (7%)          | 64 (10%)         | 63 (13%)         | <0.001  |
| Obesity                                            | 102 (14%)                                       | 161 (20%)        | 161 (26%)        | 143 (29%)        | <0.001  |
| Cholesterol, mmol/L <sup>d</sup> , mean $\pm$ SD   | 5.6 $\pm$ 1.1                                   | 5.5 $\pm$ 1.0    | 5.3 $\pm$ 1.1    | 5.2 $\pm$ 1.1    | <0.001  |

SD: standard deviation, hypertension: sitting blood pressure  $\geq 140/90$  mm Hg or use of antihypertensive medication, Diabetes: history of diabetes or increased levels of HbA1c or fasting blood glucose, or use of antidiabetic medication, Obesity: body mass index  $\geq 30$  kg/m<sup>2</sup>, Cardiac disease: history of coronary heart disease, angina, atrial fibrillation or heart failure. <sup>a</sup>34 missing values, <sup>b</sup>19 missing values, <sup>c</sup>1 missing value, <sup>d</sup>1 missing value.

**Table S3:** Characteristics at the first visit of the ACE 1950 Study (2012-2015, at ages 62-65 years) among participants without versus with participation in the Age 40 Program, n=3 706.

|                                                                | Without participation<br>in Age 40 Program<br>n = 973 | With participation<br>in Age 40 Program<br>n = 2733 | P value |
|----------------------------------------------------------------|-------------------------------------------------------|-----------------------------------------------------|---------|
| Age, years, mean $\pm$ SD                                      | 63.9 $\pm$ 0.7                                        | 63.9 $\pm$ 0.6                                      | 0.435   |
| Female sex                                                     | 430 (44%)                                             | 1377 (50%)                                          | 0.001   |
| Non-Caucasian                                                  | 40 (4%)                                               | 42 (2%)                                             | <0.001  |
| Higher education <sup>a</sup>                                  | 498 (51%)                                             | 1215 (45%)                                          | <0.001  |
| Smoking, current or previous <sup>b</sup>                      | 632 (66%)                                             | 1796 (66%)                                          | 0.748   |
| Medical history                                                |                                                       |                                                     |         |
| Hypertension <sup>c</sup>                                      | 633 (65%)                                             | 1664 (61%)                                          | 0.022   |
| Diabetes <sup>d</sup>                                          | 100 (10%)                                             | 217 (8%)                                            | 0.025   |
| Stroke                                                         | 45 (5%)                                               | 95 (3%)                                             | 0.107   |
| Obesity                                                        | 241 (25%)                                             | 598 (22%)                                           | 0.065   |
| Cholesterol, mmol/L <sup>e</sup> , mean $\pm$ SD               | 5.4 $\pm$ 1.2                                         | 5.4 $\pm$ 1.1                                       | 0.425   |
| Functional status                                              |                                                       |                                                     |         |
| Admitted to hospital<br>during the last 12 months <sup>f</sup> | 111 (11%)                                             | 338 (12%)                                           | 0.432   |
| At least 30 min of physical<br>activity daily <sup>g</sup>     | 792 (83%)                                             | 2299 (85%)                                          | 0.127   |

SD: standard deviation, Higher education: at least 4 years of college or university training, Hypertension: sitting blood pressure  $\geq$  140/90 mm Hg or use of antihypertensive medication, Diabetes: history of diabetes or increased levels of HbA1c or fasting blood glucose, or use of antidiabetic medication, Obesity: body mass index  $\geq$  30 kg/m<sup>2</sup>. <sup>a</sup>11 missing values, <sup>b</sup>30 missing values, <sup>c</sup>1 missing value, <sup>d</sup>2 missing values, <sup>e</sup>3 missing values, <sup>f</sup>7 missing values, <sup>g</sup>54 missing values.

**Table S4:** Incident stroke by systolic blood pressure at age 40 years among women and men, n=2 608.

|                 | Systolic blood pressure at age 40 years (mm Hg) |           |           |           |             |
|-----------------|-------------------------------------------------|-----------|-----------|-----------|-------------|
|                 | <120                                            | 120-129   | 130-139   | ≥140      | Total       |
| N               | 711 (27%)                                       | 792 (30%) | 617 (24%) | 488 (19%) | 2608 (100%) |
| Incident stroke |                                                 |           |           |           |             |
| Men             | 8 (10%)                                         | 20 (24%)  | 21 (25%)  | 34 (41%)  | 83 (100%)   |
| Women           | 9 (28%)                                         | 8 (25%)   | 6 (19%)   | 9 (28%)   | 32 (100%)   |
| Total           | 17 (15%)                                        | 28 (24%)  | 27 (24%)  | 43 (37%)  | 115 (100%)  |

**Table S5:** Hazard ratios of incident stroke in men and women by systolic blood pressure categories and at age 40 years, n=2 608.

|              | N (%)     | Crude                |         | Adjusted*            |         |
|--------------|-----------|----------------------|---------|----------------------|---------|
|              |           | HR (95% CI)          | p-value | HR (95% CI)          | p-value |
| <b>Men</b>   |           |                      |         |                      |         |
| SBP, mm Hg   |           |                      |         |                      |         |
| < 120        | 160 (12%) | 1 (reference)        | -       | 1 (reference)        | -       |
| 120 – 129    | 382 (30%) | 1.19 (0.50 to 2.81)  | 0.692   | 1.51 (0.56 to 4.06)  | 0.412   |
| 130 – 139    | 389 (30%) | 1.23 (0.52 to 2.90)  | 0.632   | 1.64 (0.62 to 4.37)  | 0.321   |
| ≥ 140        | 364 (28%) | 2.17 (0.96 to 4.90)  | 0.061   | 2.66 (1.03 to 6.89)  | 0.043   |
| <b>Women</b> |           |                      |         |                      |         |
| SBP, mm Hg   |           |                      |         |                      |         |
| < 120        | 551 (42%) | 1 (reference)        | -       | 1 (reference)        | -       |
| 120 – 129    | 410 (31%) | 1.20 (0.46 to 3.11)  | 0.710   | 1.21 (0.46 to 3.14)  | 0.701   |
| 130 – 139    | 228 (17%) | 1.62 (0.58 to 4.55)  | 0.360   | 1.57 (0.55 to 4.48)  | 0.401   |
| ≥ 140        | 124 (10%) | 4.64 (1.84 to 11.68) | 0.001   | 4.32 (1.66 to 11.26) | 0.003   |

SBP: Systolic blood pressure, HR: Hazard ratio, 95% CI: 95% confidence interval. \*Adjusted for age, smoking, total cholesterol, physical activity, obesity, education.

**Table S6:** Hazard ratios of incident stroke by age, sex, smoking, cholesterol, physical activity, obesity, and education, n=2 608.

|                                                   | N (%)      | HR (95% CI)         | p-value |
|---------------------------------------------------|------------|---------------------|---------|
| Age at the Age 40 Program, years                  | -          | 0.98 (0.49 to 1.99) | 0.963   |
| Sex                                               |            |                     |         |
| Male                                              | 1295 (50%) | 1 (ref)             | -       |
| Female                                            | 1313 (50%) | 0.54 (0.34 to 0.85) | 0.008   |
| Smoking                                           |            |                     |         |
| Never                                             | 1031 (40%) | 1 (ref)             | -       |
| Current or previous                               | 1552 (60%) | 1.64 (1.07 to 2.52) | 0.025   |
| Cholesterol, mmol/L                               | -          | 1.11 (0.92 to 1.33) | 0.286   |
| Physical activity                                 |            |                     |         |
| Sedentary activity                                | 484 (19%)  | 1 (ref)             | -       |
| Walking or cycling at least 4 h/week              | 1576 (60%) | 0.88 (0.55 to 1.42) | 0.604   |
| Recreational sports at least 4 h/week             | 495 (19%)  | 0.65 (0.35 to 1.21) | 0.178   |
| Hard training several times per week              | 53 (2%)    | 0.71 (0.17 to 3.05) | 0.649   |
| Obesity                                           |            |                     |         |
| Non-obese                                         | 2452 (94%) | 1 (ref)             | -       |
| Obese                                             | 156 (6%)   | 0.98 (0.47 to 2.04) | 0.955   |
| Education                                         |            |                     |         |
| Less than 7 years of formal education             | 16 (1%)    | 1 (ref)             | -       |
| Primary and lower secondary school                | 449 (17%)  | 0.75 (0.10 to 5.65) | 0.784   |
| Upper secondary school, vocational programme      | 622 (24%)  | 0.74 (0.10 to 5.43) | 0.765   |
| Upper secondary school, general studies programme | 353 (14%)  | 0.57 (0.07 to 4.43) | 0.592   |
| College or university, less than 4 years          | 609 (23%)  | 0.86 (0.12 to 6.33) | 0.884   |
| College or university, at least 4 years           | 551 (21%)  | 0.59 (0.08 to 4.46) | 0.609   |

SBP: Systolic blood pressure, HR: Hazard ratio, 95% CI: 95% confidence interval, Obesity: body mass index  $\geq 30$  kg/m<sup>2</sup>.
